# Supplementary material
Source: Research Square preprint supplement (doi:10.21203/rs.3.rs-9056343/v1)
Supplement: Supplementary file 1 [file 99a3a9204534ef3355cb1430.docx]

**Supplementary Table-1:** PGX Resistance Weight Score (RWS)

**Supplementary Table-1A:** PGX Resistance Weight Score (RWS) for NRTIs and NNRTIs

| Mutation | ABC | AZT | FTC | 3TC | TDF |  | Mutation | DOR | EFV | ETR | NVP | RPV |
| --- | --- | --- | --- | --- | --- | --- | --- | --- | --- | --- | --- | --- |
| E40F | 0 | 0 | 0 | 0 | 0 |  | V90I | 0 | 0 | 0 | 0 | 8.3 |
| M41L | 8.3 | 24.9 | 0 | 0 | 8.3 |  | A98G | 16.6 | 16.6 | 16.6 | 49.8 | 24.9 |
| E44A | 0 | 0 | 0 | 0 | 0 |  | L100I | 16.6 | 74.7 | 49.8 | 99.6 | 74.7 |
| E44D | 0 | 0 | 0 | 0 | 0 |  | L100V | 8.3 | 24.9 | 16.6 | 49.8 | 24.9 |
| A62V | 8.3 | 8.3 | 0 | 0 | 8.3 |  | K101E | 8.3 | 24.9 | 16.6 | 49.8 | 74.7 |
| K65E | 16.6 | 0 | 0 | 0 | 16.6 |  | K101P | 8.3 | 99.6 | 74.7 | 99.6 | 99.6 |
| K65N | 49.8 | 0 | 24.9 | 24.9 | 49.8 |  | K101H | 0 | 16.6 | 16.6 | 24.9 | 16.6 |
| K65R | 74.7 | -16.6 | 24.9 | 24.9 | 74.7 |  | K103H | 0 | 99.6 | 0 | 99.6 | 0 |
| D67E | 8.3 | 24.9 | 0 | 0 | 8.3 |  | K103N | 0 | 99.6 | 0 | 99.6 | 0 |
| D67G | 8.3 | 24.9 | 0 | 0 | 8.3 |  | K103S | 0 | 74.7 | 0 | 99.6 | 0 |
| D67H | 8.3 | 24.9 | 0 | 0 | 8.3 |  | K103T | 0 | 24.9 | 0 | 99.6 | 0 |
| D67N | 8.3 | 24.9 | 0 | 0 | 8.3 |  | K103R | 0 | 0 | 0 | 0 | 0 |
| D67S | 8.3 | 24.9 | 0 | 0 | 8.3 |  | V106A | 99.6 | 74.7 | 0 | 99.6 | 8.3 |
| D67T | 8.3 | 24.9 | 0 | 0 | 8.3 |  | V106I | 8.3 | 8.3 | 8.3 | 8.3 | 8.3 |
| D67del | 24.9 | 49.8 | 24.9 | 24.9 | 24.9 |  | V106L | 49.8 | 16.6 | 0 | 49.8 | 0 |
| S68del | 24.9 | 0 | 24.9 | 24.9 | 24.9 |  | V106M | 49.8 | 99.6 | 0 | 99.6 | 0 |
| S68G | 0 | 0 | 0 | 0 | 0 |  | V108I | 8.3 | 16.6 | 0 | 24.9 | 8.3 |
| S68N | 0 | 0 | 0 | 0 | 0 |  | E138K | 0 | 16.6 | 16.6 | 16.6 | 74.7 |
| T69G | 16.6 | 8.3 | 0 | 0 | 8.3 |  | E138G | 0 | 16.6 | 16.6 | 16.6 | 33.2 |
| T69ins | 99.6 | 99.6 | 49.8 | 49.8 | 99.6 |  | E138Q | 0 | 16.6 | 16.6 | 16.6 | 33.2 |
| T69del | 24.9 | 0 | 24.9 | 24.9 | 24.9 |  | E138R | 0 | 16.6 | 16.6 | 16.6 | 33.2 |
| T69D | 0 | 0 | 0 | 0 | 0 |  | E138A | 0 | 0 | 16.6 | 0 | 16.6 |
| K70E | 24.9 | 0 | 16.6 | 16.6 | 24.9 |  | V179F | 8.3 | 16.6 | 24.9 | 24.9 | 24.9 |
| K70G | 24.9 | 0 | 16.6 | 16.6 | 24.9 |  | V179D | 0 | 16.6 | 16.6 | 16.6 | 16.6 |
| K70N | 24.9 | 0 | 16.6 | 16.6 | 24.9 |  | V179E | 0 | 16.6 | 16.6 | 16.6 | 16.6 |
| K70Q | 24.9 | 0 | 16.6 | 16.6 | 24.9 |  | V179L | 0 | 16.6 | 16.6 | 16.6 | 16.6 |
| K70R | 8.3 | 49.8 | 0 | 0 | 8.3 |  | V179T | 0 | 0 | 0 | 0 | 0 |
| K70S | 24.9 | 0 | 16.6 | 16.6 | 24.9 |  | Y181C | 8.3 | 49.8 | 49.8 | 99.6 | 74.7 |
| K70T | 24.9 | 0 | 16.6 | 16.6 | 24.9 |  | Y181I | 16.6 | 49.8 | 99.6 | 99.6 | 99.6 |
| K70del | 24.9 | 0 | 16.6 | 16.6 | 24.9 |  | Y181V | 16.6 | 49.8 | 99.6 | 99.6 | 99.6 |
| L74I | 24.9 | 0 | 0 | 0 | 8.3 |  | Y181F | 0 | 24.9 | 24.9 | 99.6 | 49.8 |
| L74V | 49.8 | 0 | 0 | 0 | 0 |  | Y181G | 0 | 24.9 | 24.9 | 99.6 | 49.8 |
| V75I | 8.3 | 8.3 | 8.3 | 8.3 | 8.3 |  | Y181S | 0 | 24.9 | 24.9 | 99.6 | 49.8 |
| V75A | 0 | 16.6 | 0 | 0 | 0 |  | M184I | 0 | 0 | 0 | 0 | 0 |
| V75M | 0 | 16.6 | 0 | 0 | 0 |  | Y188F | 49.8 | 99.6 | 0 | 99.6 | 49.8 |
| V75S | 0 | 16.6 | 0 | 0 | 0 |  | Y188L | 99.6 | 99.6 | 24.9 | 99.6 | 99.6 |
| V75T | 0 | 16.6 | 0 | 0 | 0 |  | Y188C | 0 | 49.8 | 0 | 99.6 | 0 |
| F77L | 8.3 | 8.3 | 8.3 | 8.3 | 8.3 |  | Y188H | 0 | 49.8 | 0 | 99.6 | 0 |
| Y115F | 49.8 | 0 | 0 | 0 | 24.9 |  | G190C | 16.6 | 99.6 | 16.6 | 99.6 | 16.6 |
| F116Y | 8.3 | 16.6 | 8.3 | 8.3 | 8.3 |  | G190E | 99.6 | 99.6 | 74.7 | 99.6 | 99.6 |
| Q151L | 49.8 | 49.8 | 16.6 | 16.6 | 16.6 |  | G190Q | 49.8 | 99.6 | 74.7 | 99.6 | 74.7 |
| Q151M | 99.6 | 99.6 | 24.9 | 24.9 | 24.9 |  | G190S | 16.6 | 99.6 | 16.6 | 99.6 | 24.9 |
| M184I | 24.9 | -16.6 | 99.6 | 99.6 | -16.6 |  | G190T | 16.6 | 99.6 | 16.6 | 99.6 | 16.6 |
| M184V | 24.9 | -16.6 | 99.6 | 99.6 | -16.6 |  | G190V | 16.6 | 99.6 | 16.6 | 99.6 | 16.6 |
| L210W | 8.3 | 24.9 | 0 | 0 | 8.3 |  | G190A | 0 | 74.7 | 16.6 | 99.6 | 24.9 |
| T215F | 16.6 | 99.6 | 0 | 0 | 16.6 |  | H221Y | 8.3 | 16.6 | 16.6 | 24.9 | 16.6 |
| T215Y | 16.6 | 99.6 | 0 | 0 | 16.6 |  | P225H | 16.6 | 74.7 | 0 | 74.7 | 0 |
| T215A | 0 | 16.6 | 0 | 0 | 0 |  | F227C | 99.6 | 74.7 | 49.8 | 74.7 | 74.7 |
| T215C | 0 | 16.6 | 0 | 0 | 0 |  | F227I | 74.7 | 16.6 | 0 | 49.8 | 0 |
| T215D | 0 | 16.6 | 0 | 0 | 0 |  | F227L | 99.6 | 24.9 | 0 | 49.8 | 8.3 |
| T215E | 0 | 16.6 | 0 | 0 | 0 |  | F227V | 74.7 | 16.6 | 0 | 49.8 | 0 |
| T215I | 0 | 33.2 | 0 | 0 | 0 |  | F227Y | 24.9 | 0 | 0 | 16.6 | 24.9 |
| T215L | 0 | 16.6 | 0 | 0 | 0 |  | M230L | 99.6 | 74.7 | 49.8 | 99.6 | 99.6 |
| T215N | 0 | 16.6 | 0 | 0 | 0 |  | M230I | 0 | 16.6 | 0 | 49.8 | 49.8 |
| T215S | 0 | 16.6 | 0 | 0 | 0 |  | L234I | 74.7 | 0 | 0 | 0 | 0 |
| T215V | 0 | 33.2 | 0 | 0 | 0 |  | P236L | 8.3 | 0 | 0 | 0 | 0 |
| K219E | 0 | 16.6 | 0 | 0 | 0 |  | K238N | 0 | 16.6 | 0 | 16.6 | 0 |
| K219N | 0 | 16.6 | 0 | 0 | 0 |  | K238T | 0 | 49.8 | 0 | 49.8 | 0 |
| K219Q | 0 | 16.6 | 0 | 0 | 0 |  | Y318F | 99.6 | 16.6 | 0 | 49.8 | 0 |
| K219R | 0 | 16.6 | 0 | 0 | 0 |  | N348I | 0 | 0 | 0 | 24.9 | 0 |
| K219W | 0 | 16.6 | 0 | 0 | 0 |  | V106T | 30 | 40 | 5 | 35 | 5 |
| E40F | 15 | 5 | 0 | 0 | 5 |  | F227C | 25 | 30 | 15 | 35 | 20 |
| E44A | 20 | 10 | 0 | 0 | 10 |  | F227R | 30 | 35 | 20 | 40 | 25 |
| E44D | 25 | 15 | 0 | 0 | 15 |  | V179T | 20 | 25 | 10 | 30 | 15 |
| S68Del | 30 | 20 | 0 | 0 | 25 |  |  |  |  |  |  |  |
| T69D | 35 | 25 | 5 | 5 | 30 |  |  |  |  |  |  |  |

**Supplementary Table-1B:** PGX Resistance Weight Score (RWS) for PIs and INSTIs

| Mutation | ATV/r | DRV/r | LPV/r |  | Mutation | BIC | CAB | DTG | EVG | RAL |
| --- | --- | --- | --- | --- | --- | --- | --- | --- | --- | --- |
| L10F | 8.3 | 8.3 | 8.3 |  | A49G | 0 | 0 | 0 | 0 | 0 |
| V11I | 0 | 0 | 0 |  | H51Y | 16.6 | 24.9 | 16.6 | 24.9 | 24.9 |
| V11L | 0 | 0 | 0 |  | T66A | 8.3 | 8.3 | 8.3 | 99.6 | 24.9 |
| K20T | 8.3 | 0 | 0 |  | T66I | 8.3 | 16.6 | 8.3 | 99.6 | 24.9 |
| L23I | 0 | 0 | 0 |  | T66K | 24.9 | 33.2 | 24.9 | 99.6 | 99.6 |
| L24F | 8.3 | 0 | 8.3 |  | L74F | 8.3 | 8.3 | 8.3 | 8.3 | 8.3 |
| L24I | 16.6 | 0 | 16.6 |  | L74M | 8.3 | 8.3 | 8.3 | 8.3 | 8.3 |
| L24M | 8.3 | 0 | 8.3 |  | L74I | 0 | 16.6 | 0 | 0 | 0 |
| D30N | 0 | 0 | 0 |  | V75A | 0 | 16.6 | 0 | 0 | 0 |
| V32I | 24.9 | 24.9 | 24.9 |  | V75I | 0 | 0 | 0 | 0 | 0 |
| L33F | 8.3 | 8.3 | 8.3 |  | E92Q | 16.6 | 24.9 | 16.6 | 99.6 | 49.8 |
| K43T | 0 | 0 | 0 |  | E92G | 0 | 16.6 | 0 | 49.8 | 24.9 |
| M46I | 16.6 | 0 | 16.6 |  | E92V | 0 | 16.6 | 0 | 99.6 | 49.8 |
| M46L | 16.6 | 0 | 16.6 |  | Q95K | 0 | 0 | 0 | 16.6 | 16.6 |
| M46V | 8.3 | 0 | 8.3 |  | T97A | 0 | 0 | 0 | 16.6 | 16.6 |
| I47V | 16.6 | 16.6 | 24.9 |  | G118R | 74.7 | 99.6 | 99.6 | 99.6 | 99.6 |
| I47A | 0 | 16.6 | 99.6 |  | F121C | 24.9 | 49.8 | 24.9 | 99.6 | 99.6 |
| G48A | 16.6 | 0 | 16.6 |  | F121Y | 16.6 | 24.9 | 16.6 | 99.6 | 99.6 |
| G48L | 16.6 | 0 | 16.6 |  | T122N | 0 | 16.6 | 0 | 0 | 0 |
| G48M | 49.8 | 0 | 16.6 |  | E138A | 16.6 | 24.9 | 16.6 | 24.9 | 24.9 |
| G48Q | 16.6 | 0 | 16.6 |  | E138K | 16.6 | 24.9 | 16.6 | 24.9 | 24.9 |
| G48S | 16.6 | 0 | 16.6 |  | E138T | 16.6 | 24.9 | 16.6 | 24.9 | 24.9 |
| G48T | 16.6 | 0 | 16.6 |  | G140A | 16.6 | 24.9 | 16.6 | 49.8 | 49.8 |
| G48V | 49.8 | 0 | 16.6 |  | G140C | 16.6 | 24.9 | 16.6 | 49.8 | 49.8 |
| I50L | 99.6 | -16.6 | -16.6 |  | G140R | 16.6 | 99.6 | 16.6 | 49.8 | 49.8 |
| I50V | 0 | 33.2 | 49.8 |  | G140S | 16.6 | 24.9 | 16.6 | 49.8 | 49.8 |
| F53L | 16.6 | 0 | 0 |  | Y143A | 0 | 8.3 | 0 | 16.6 | 99.6 |
| F53Y | 8.3 | 0 | 0 |  | Y143C | 0 | 8.3 | 0 | 16.6 | 99.6 |
| I54A | 24.9 | 0 | 24.9 |  | Y143G | 0 | 8.3 | 0 | 16.6 | 99.6 |
| I54L | 24.9 | 33.2 | 33.2 |  | Y143H | 0 | 8.3 | 0 | 16.6 | 99.6 |
| I54M | 24.9 | 33.2 | 33.2 |  | Y143K | 0 | 8.3 | 0 | 16.6 | 99.6 |
| I54S | 24.9 | 0 | 24.9 |  | Y143R | 0 | 8.3 | 0 | 16.6 | 99.6 |
| I54T | 24.9 | 0 | 24.9 |  | Y143S | 0 | 8.3 | 0 | 16.6 | 99.6 |
| I54V | 24.9 | 0 | 24.9 |  | P145S | 0 | 0 | 0 | 99.6 | 0 |
| Q58E | 0 | 0 | 0 |  | Q146I | 8.3 | 16.6 | 8.3 | 99.6 | 24.9 |
| G73A | 16.6 | 0 | 8.3 |  | Q146L | 8.3 | 16.6 | 8.3 | 49.8 | 0 |
| G73C | 16.6 | 0 | 8.3 |  | Q146P | 8.3 | 16.6 | 8.3 | 99.6 | 0 |
| G73D | 8.3 | 0 | 8.3 |  | Q146R | 8.3 | 16.6 | 8.3 | 8.3 | 8.3 |
| G73S | 16.6 | 0 | 8.3 |  | S147G | 16.6 | 24.9 | 16.6 | 99.6 | 16.6 |
| G73T | 16.6 | 0 | 8.3 |  | Q148H | 41.5 | 99.6 | 41.5 | 99.6 | 99.6 |
| G73V | 8.3 | 0 | 8.3 |  | Q148K | 49.8 | 99.6 | 49.8 | 99.6 | 99.6 |
| T74P | 16.6 | 8.3 | 8.3 |  | Q148R | 41.5 | 99.6 | 41.5 | 99.6 | 99.6 |
| L76V | 0 | 33.2 | 49.8 |  | Q148N | 0 | 16.6 | 0 | 16.6 | 16.6 |
| V82A | 24.9 | 0 | 49.8 |  | G149A | 8.3 | 8.3 | 8.3 | 8.3 | 8.3 |
| V82C | 24.9 | 0 | 24.9 |  | V151L | 24.9 | 24.9 | 24.9 | 99.6 | 49.8 |
| V82F | 24.9 | 24.9 | 49.8 |  | V151A | 0 | 0 | 0 | 49.8 | 24.9 |
| V82L | 16.6 | 0 | 16.6 |  | V151I | 0 | 0 | 0 | 8.3 | 8.3 |
| V82M | 16.6 | 0 | 41.5 |  | S153F | 24.9 | 41.5 | 24.9 | 41.5 | 16.6 |
| V82S | 49.8 | 0 | 49.8 |  | S153Y | 24.9 | 41.5 | 24.9 | 41.5 | 16.6 |
| V82T | 49.8 | 0 | 49.8 |  | N155H | 16.6 | 41.5 | 16.6 | 99.6 | 99.6 |
| N83D | 16.6 | 0 | 0 |  | N155S | 0 | 16.6 | 0 | 49.8 | 49.8 |
| I84A | 99.6 | 49.8 | 99.6 |  | N155T | 0 | 16.6 | 0 | 49.8 | 49.8 |
| I84C | 74.7 | 24.9 | 16.6 |  | E157Q | 0 | 0 | 0 | 16.6 | 16.6 |
| I84V | 99.6 | 24.9 | 49.8 |  | G163K | 0 | 0 | 0 | 24.9 | 24.9 |
| N88D | 16.6 | 0 | 0 |  | G163R | 0 | 0 | 0 | 24.9 | 24.9 |
| N88G | 24.9 | 0 | 0 |  | S230R | 16.6 | 24.9 | 16.6 | 33.2 | 33.2 |
| N88S | 99.6 | -8.3 | 0 |  | D232N | 0 | 0 | 0 | 16.6 | 16.6 |
| N88T | 24.9 | 0 | 0 |  | R263K | 49.8 | 99.6 | 49.8 | 49.8 | 24.9 |
| L89T | 8.3 | 0 | 0 |  | L74I | 5 | 5 | 5 | 15 | 20 |
| L89V | 0 | 8.3 | 0 |  |  |  |  |  |  |  |
| L90M | 33.2 | 0 | 16.6 |  |  |  |  |  |  |  |
| F35Y | 15 | 5 | 20 |  |  |  |  |  |  |  |
| I85V | 25 | 10 | 30 |  |  |  |  |  |  |  |
| V11I | 10 | 0 | 10 |  |  |  |  |  |  |  |
| L10I | 5 | 0 | 5 |  |  |  |  |  |  |  |
| L10R | 10 | 5 | 10 |  |  |  |  |  |  |  |
| L10V | 10 | 5 | 10 |  |  |  |  |  |  |  |
| L10F | 15 | 5 | 15 |  |  |  |  |  |  |  |
| K20M | 10 | 0 | 10 |  |  |  |  |  |  |  |
| K20R | 10 | 0 | 10 |  |  |  |  |  |  |  |
| A71V | 15 | 5 | 15 |  |  |  |  |  |  |  |
| A71T | 15 | 5 | 15 |  |  |  |  |  |  |  |
| M36I | 5 | 0 | 5 |  |  |  |  |  |  |  |
| M36L | 5 | 0 | 5 |  |  |  |  |  |  |  |
| M36V | 10 | 0 | 10 |  |  |  |  |  |  |  |
| K43T | 10 | 5 | 20 |  |  |  |  |  |  |  |
| M46L | 20 | 10 | 25 |  |  |  |  |  |  |  |
| Q58E | 15 | 5 | 15 |  |  |  |  |  |  |  |
| H69K | 5 | 0 | 5 |  |  |  |  |  |  |  |
| H69R | 5 | 0 | 5 |  |  |  |  |  |  |  |
| L89I | 10 | 5 | 10 |  |  |  |  |  |  |  |
| L89V | 15 | 10 | 15 |  |  |  |  |  |  |  |
| V77I | 5 | 0 | 5 |  |  |  |  |  |  |  |
| D30N | 0 | 0 | 40 |  |  |  |  |  |  |  |
| I54L | 20 | 10 | 25 |  |  |  |  |  |  |  |
| I62V | 10 | 5 | 10 |  |  |  |  |  |  |  |
| V11L | 5 | 0 | 5 |  |  |  |  |  |  |  |
| V11I | 10 | 0 | 10 |  |  |  |  |  |  |  |
| L23I | 5 | 0 | 5 |  |  |  |  |  |  |  |
| D30N | 0 | 0 | 40 |  |  |  |  |  |  |  |
| K43T | 10 | 5 | 20 |  |  |  |  |  |  |  |
| F53Y | 20 | 10 | 25 |  |  |  |  |  |  |  |
| Q58E | 15 | 5 | 15 |  |  |  |  |  |  |  |
| I85V | 25 | 10 | 30 |  |  |  |  |  |  |  |

**Note:** This mutation list is retrieved from Stanford HIVdb mutation score list, IAS-USA 2025 HIVDR mutations review, and WHO HIVDR SDRM (2021)

**Supplementary Table-2:** PGX Training Model Performance (Disaggregated by each models)

| Drug | Model | R2 | RMSE | CRPS_Total | R2_Score | Spearman_Score | MAE_Score | Accuracy_Score | Stability_Score |
| --- | --- | --- | --- | --- | --- | --- | --- | --- | --- |
| ABC | RandomForest | 0.57 | 2.51 | 59.80 | 3.48 | 7.96 | 19.23 | 13.10 | 16.02 |
| ABC | XGBoost | 0.12 | 2.58 | 57.06 | 2.50 | 8.15 | 19.19 | 11.72 | 15.50 |
| ABC | LightGBM | 0.17 | 2.52 | 61.22 | 3.32 | 8.82 | 19.20 | 13.45 | 16.43 |
| ABC | ElasticNet | 0.30 | 2.31 | 63.26 | 6.01 | 10.40 | 19.27 | 12.76 | 14.83 |
| ABC | Ensemble | 0.53 | 2.31 | 64.17 | 6.05 | 8.97 | 19.27 | 13.79 | 16.07 |
| D4T | RandomForest | 0.64 | 0.96 | 75.34 | 12.73 | 15.56 | 19.73 | 13.65 | 13.67 |
| D4T | XGBoost | 0.63 | 0.97 | 73.65 | 12.59 | 15.10 | 19.71 | 12.70 | 13.54 |
| D4T | LightGBM | 0.47 | 1.16 | 71.86 | 9.47 | 15.50 | 19.69 | 12.70 | 14.50 |
| D4T | ElasticNet | 0.74 | 0.82 | 75.53 | 14.76 | 14.74 | 19.75 | 12.70 | 13.58 |
| D4T | Ensemble | 0.76 | 0.79 | 78.08 | 15.13 | 15.91 | 19.76 | 13.02 | 14.26 |
| NVP | RandomForest | 0.80 | 15.56 | 78.97 | 15.92 | 17.73 | 16.47 | 16.77 | 12.08 |
| NVP | XGBoost | 0.77 | 16.35 | 78.79 | 15.49 | 17.62 | 16.47 | 17.42 | 11.80 |
| NVP | LightGBM | 0.77 | 16.57 | 77.60 | 15.37 | 17.20 | 15.88 | 16.77 | 12.38 |
| NVP | ElasticNet | 0.26 | 29.71 | 58.20 | 5.11 | 10.80 | 9.73 | 15.81 | 16.76 |
| NVP | Ensemble | 0.78 | 16.00 | 78.30 | 15.68 | 17.50 | 15.30 | 16.13 | 13.69 |
| 3TC | RandomForest | 0.89 | 14.36 | 83.40 | 17.70 | 19.30 | 17.45 | 16.10 | 12.84 |
| 3TC | XGBoost | 0.85 | 16.66 | 81.55 | 16.91 | 18.84 | 17.44 | 15.58 | 12.78 |
| 3TC | LightGBM | 0.87 | 15.41 | 82.19 | 17.36 | 18.74 | 16.93 | 16.36 | 12.80 |
| 3TC | ElasticNet | 0.15 | 39.07 | 50.55 | 3.02 | 10.71 | 5.99 | 14.03 | 16.81 |
| 3TC | Ensemble | 0.84 | 17.11 | 77.78 | 16.74 | 17.92 | 14.84 | 14.03 | 14.25 |
| EFV | RandomForest | 0.85 | 12.35 | 78.52 | 16.96 | 18.40 | 16.83 | 15.63 | 10.71 |
| EFV | XGBoost | 0.84 | 12.65 | 77.35 | 16.81 | 18.25 | 16.95 | 15.31 | 10.02 |
| EFV | LightGBM | 0.74 | 16.23 | 73.12 | 14.75 | 16.50 | 15.05 | 15.00 | 11.82 |
| EFV | ElasticNet | 0.13 | 29.55 | 53.42 | 2.60 | 11.32 | 10.87 | 12.81 | 15.82 |
| EFV | Ensemble | 0.79 | 14.34 | 76.39 | 15.90 | 18.30 | 15.55 | 13.75 | 12.90 |
| AZT | RandomForest | 0.74 | 14.67 | 78.00 | 14.81 | 16.81 | 16.02 | 18.10 | 12.27 |
| AZT | XGBoost | 0.71 | 15.41 | 76.93 | 14.27 | 16.72 | 16.06 | 18.10 | 11.78 |
| AZT | LightGBM | 0.71 | 15.44 | 75.61 | 14.25 | 16.58 | 15.77 | 16.51 | 12.50 |
| AZT | ElasticNet | 0.33 | 23.64 | 63.56 | 6.52 | 14.21 | 13.14 | 14.92 | 14.77 |
| AZT | Ensemble | 0.74 | 14.66 | 76.87 | 14.81 | 16.98 | 15.70 | 16.19 | 13.18 |
| DDI | RandomForest | 0.54 | 0.57 | 70.14 | 10.87 | 10.35 | 19.83 | 12.70 | 16.39 |
| DDI | XGBoost | 0.36 | 0.68 | 64.40 | 7.15 | 8.39 | 19.80 | 13.02 | 16.04 |
| DDI | LightGBM | 0.17 | 0.77 | 62.74 | 3.37 | 9.71 | 19.76 | 13.65 | 16.25 |
| DDI | ElasticNet | 0.61 | 0.53 | 76.46 | 12.23 | 12.23 | 19.85 | 15.56 | 16.59 |
| DDI | Ensemble | 0.58 | 0.55 | 72.57 | 11.61 | 10.47 | 19.83 | 13.97 | 16.68 |
| TDF | RandomForest | 0.61 | 0.78 | 76.33 | 12.14 | 16.40 | 19.80 | 14.44 | 13.55 |
| TDF | XGBoost | 0.49 | 0.89 | 74.07 | 9.73 | 16.47 | 19.78 | 14.81 | 13.28 |
| TDF | LightGBM | 0.55 | 0.83 | 75.18 | 10.99 | 16.87 | 19.78 | 12.96 | 14.59 |
| TDF | ElasticNet | 0.62 | 0.76 | 77.75 | 12.48 | 14.90 | 19.78 | 16.67 | 13.92 |
| TDF | Ensemble | 0.70 | 0.68 | 79.46 | 13.95 | 16.87 | 19.82 | 14.44 | 14.37 |
| ETR | RandomForest | 0.68 | 6.72 | 70.35 | 13.61 | 17.26 | 18.72 | 15.86 | 4.89 |
| ETR | XGBoost | 0.64 | 7.11 | 66.06 | 12.84 | 16.72 | 18.80 | 15.86 | 1.85 |
| ETR | LightGBM | 0.41 | 9.10 | 57.72 | 8.27 | 13.78 | 18.06 | 11.03 | 6.58 |
| ETR | ElasticNet | 0.72 | 6.33 | 59.80 | 14.33 | 12.63 | 18.38 | 8.97 | 5.50 |
| ETR | Ensemble | 0.69 | 6.58 | 70.23 | 13.86 | 15.81 | 18.80 | 15.86 | 5.88 |
| FTC | RandomForest | 0.95 | 9.42 | 86.21 | 18.95 | 19.24 | 17.92 | 17.33 | 12.78 |
| FTC | XGBoost | 0.91 | 12.51 | 86.75 | 18.14 | 18.71 | 17.47 | 20.00 | 12.42 |
| FTC | LightGBM | -0.03 | 41.58 | 39.47 | 0.00 | 0.00 | 4.80 | 14.67 | 20.00 |
| FTC | ElasticNet | -0.23 | 45.54 | 36.05 | 0.00 | 1.44 | 3.73 | 14.67 | 16.21 |
| FTC | Ensemble | 0.68 | 23.34 | 73.41 | 13.53 | 18.29 | 11.12 | 14.67 | 15.80 |
| EVG | RandomForest | 0.83 | 14.08 | 81.24 | 16.69 | 17.52 | 16.18 | 17.04 | 13.82 |
| EVG | XGBoost | 0.62 | 21.23 | 73.00 | 12.46 | 14.64 | 14.85 | 17.04 | 14.02 |
| EVG | LightGBM | 0.74 | 17.57 | 74.84 | 14.84 | 17.04 | 13.90 | 14.81 | 14.24 |
| EVG | ElasticNet | 0.38 | 27.33 | 61.97 | 7.51 | 12.62 | 10.37 | 16.30 | 15.17 |
| EVG | Ensemble | 0.74 | 17.49 | 77.29 | 14.89 | 17.34 | 14.15 | 16.30 | 14.63 |
| RAL | RandomForest | 0.76 | 15.73 | 76.11 | 15.17 | 17.38 | 15.70 | 15.71 | 12.15 |
| RAL | XGBoost | 0.58 | 20.72 | 71.90 | 11.61 | 15.74 | 16.19 | 17.14 | 11.23 |
| RAL | LightGBM | 0.59 | 20.42 | 67.86 | 11.85 | 16.59 | 14.68 | 12.86 | 11.88 |
| RAL | ElasticNet | 0.56 | 21.27 | 66.91 | 11.16 | 15.82 | 13.96 | 12.86 | 13.12 |
| RAL | Ensemble | 0.72 | 17.00 | 71.66 | 14.35 | 16.56 | 15.40 | 12.86 | 12.48 |
| DTG | RandomForest | 0.77 | 5.80 | 76.91 | 15.33 | 18.49 | 18.45 | 14.78 | 9.86 |
| DTG | XGBoost | 0.81 | 5.20 | 79.18 | 16.25 | 18.35 | 18.61 | 16.52 | 9.45 |
| DTG | LightGBM | 0.28 | 10.18 | 60.80 | 5.63 | 15.52 | 17.28 | 10.43 | 11.94 |
| DTG | ElasticNet | 0.79 | 5.53 | 75.09 | 15.76 | 17.27 | 18.85 | 16.52 | 6.69 |
| DTG | Ensemble | 0.78 | 5.60 | 77.20 | 15.65 | 18.83 | 18.66 | 13.91 | 10.14 |
| BIC | RandomForest | 0.52 | 5.10 | 70.21 | 10.48 | 17.16 | 18.93 | 12.86 | 10.78 |
| BIC | XGBoost | 0.58 | 4.77 | 73.56 | 11.67 | 15.62 | 19.14 | 17.14 | 9.99 |
| BIC | LightGBM | -0.02 | 7.47 | 40.60 | 0.00 | 0.00 | 17.74 | 2.86 | 20.00 |
| BIC | ElasticNet | 0.83 | 3.03 | 74.41 | 16.63 | 15.62 | 19.23 | 18.57 | 4.36 |
| BIC | Ensemble | 0.65 | 4.39 | 69.74 | 12.92 | 16.11 | 19.03 | 10.00 | 11.69 |
| NFV | RandomForest | 0.63 | 17.19 | 78.93 | 12.65 | 17.62 | 14.94 | 18.33 | 15.38 |
| NFV | XGBoost | 0.62 | 17.38 | 75.82 | 12.49 | 16.75 | 15.11 | 17.33 | 14.14 |
| NFV | LightGBM | 0.55 | 19.10 | 74.83 | 10.93 | 15.93 | 14.40 | 18.00 | 15.57 |
| NFV | ElasticNet | 0.23 | 24.82 | 63.54 | 4.68 | 11.80 | 12.60 | 18.00 | 16.46 |
| NFV | Ensemble | 0.58 | 18.30 | 76.68 | 11.67 | 16.72 | 14.51 | 18.00 | 15.78 |
| SQV | RandomForest | 0.62 | 19.73 | 73.12 | 12.34 | 15.90 | 15.45 | 17.63 | 11.80 |
| SQV | XGBoost | 0.35 | 25.70 | 63.99 | 7.01 | 13.94 | 14.32 | 17.29 | 11.43 |
| SQV | LightGBM | 0.66 | 18.60 | 71.34 | 13.20 | 15.69 | 14.28 | 14.92 | 13.25 |
| SQV | ElasticNet | 0.44 | 23.95 | 63.35 | 8.72 | 13.31 | 11.95 | 13.90 | 15.47 |
| SQV | Ensemble | 0.68 | 18.09 | 71.84 | 13.57 | 15.71 | 14.55 | 14.24 | 13.78 |
| FPV | RandomForest | 0.80 | 11.67 | 74.65 | 15.95 | 16.30 | 17.10 | 14.92 | 10.39 |
| FPV | XGBoost | 0.80 | 11.73 | 71.85 | 15.90 | 16.23 | 16.99 | 12.88 | 9.84 |
| FPV | LightGBM | 0.75 | 13.03 | 69.57 | 14.94 | 15.55 | 16.52 | 12.54 | 10.02 |
| FPV | ElasticNet | 0.64 | 15.54 | 71.13 | 12.81 | 17.02 | 15.82 | 12.88 | 12.59 |
| FPV | Ensemble | 0.81 | 11.33 | 74.96 | 16.18 | 16.63 | 16.88 | 14.24 | 11.04 |
| IDV | RandomForest | 0.71 | 12.47 | 78.19 | 14.16 | 16.05 | 16.43 | 17.93 | 13.62 |
| IDV | XGBoost | 0.48 | 16.65 | 70.36 | 9.59 | 14.86 | 15.52 | 17.59 | 12.80 |
| IDV | LightGBM | 0.73 | 11.95 | 77.09 | 14.64 | 16.39 | 16.15 | 16.55 | 13.36 |
| IDV | ElasticNet | 0.51 | 16.20 | 70.52 | 10.14 | 14.96 | 14.85 | 15.86 | 14.71 |
| IDV | Ensemble | 0.72 | 12.30 | 77.74 | 14.32 | 16.34 | 16.20 | 16.90 | 13.98 |
| RTV | RandomForest | 0.84 | 12.95 | 85.44 | 16.86 | 18.49 | 16.44 | 18.25 | 15.40 |
| RTV | XGBoost | 0.81 | 14.27 | 83.95 | 16.18 | 18.31 | 16.22 | 17.89 | 15.35 |
| RTV | LightGBM | 0.75 | 16.42 | 80.87 | 14.95 | 16.95 | 15.26 | 18.25 | 15.46 |
| RTV | ElasticNet | 0.49 | 23.36 | 69.34 | 9.78 | 13.56 | 12.44 | 17.19 | 16.36 |
| RTV | Ensemble | 0.81 | 14.06 | 83.66 | 16.30 | 18.15 | 15.77 | 17.54 | 15.91 |
| LPV | RandomForest | 0.77 | 14.02 | 81.15 | 15.34 | 17.64 | 15.99 | 18.11 | 14.06 |
| LPV | XGBoost | 0.71 | 15.56 | 79.21 | 14.27 | 17.20 | 15.82 | 18.49 | 13.44 |
| LPV | LightGBM | 0.74 | 14.91 | 79.32 | 14.74 | 17.20 | 15.43 | 17.74 | 14.23 |
| LPV | ElasticNet | 0.52 | 20.09 | 72.28 | 10.43 | 16.45 | 13.60 | 16.23 | 15.57 |
| LPV | Ensemble | 0.79 | 13.44 | 81.45 | 15.72 | 18.16 | 15.89 | 16.98 | 14.69 |
| TPV | RandomForest | 0.89 | 4.02 | 74.73 | 17.88 | 18.39 | 19.07 | 12.43 | 6.95 |
| TPV | XGBoost | 0.91 | 3.74 | 74.55 | 18.16 | 18.25 | 19.14 | 11.89 | 7.10 |
| TPV | LightGBM | 0.60 | 7.85 | 64.46 | 11.92 | 14.79 | 17.99 | 10.27 | 9.49 |
| TPV | ElasticNet | 0.88 | 4.22 | 72.95 | 17.67 | 17.89 | 18.66 | 9.73 | 9.00 |
| TPV | Ensemble | 0.91 | 3.62 | 73.18 | 18.28 | 18.02 | 19.02 | 9.19 | 8.67 |
| ATV | RandomForest | 0.46 | 21.81 | 70.62 | 9.26 | 14.00 | 14.35 | 19.15 | 13.86 |
| ATV | XGBoost | 0.29 | 25.10 | 63.77 | 5.77 | 12.55 | 13.07 | 19.15 | 13.23 |
| ATV | LightGBM | 0.59 | 19.13 | 74.25 | 11.73 | 16.00 | 14.45 | 18.30 | 13.77 |
| ATV | ElasticNet | 0.49 | 21.27 | 68.91 | 9.78 | 14.00 | 13.32 | 17.02 | 14.80 |
| ATV | Ensemble | 0.55 | 19.97 | 74.62 | 10.99 | 15.58 | 14.51 | 19.15 | 14.39 |

**Supplementary Table-3:** Optimal ML Models per Drug: R², CRPS, and Feature Counts

| **Drug** | **Best_R2** | **Best_CRPS** | **Mutation_Count** | **Samples** |
| --- | --- | --- | --- | --- |
| ABC | 0.530 | 64.17 | 193 | 2233 |
| D4T | 0.76 | 78.08 | 209 | 2379 |
| NVP | 0.78 | 78.30 | 204 | 2454 |
| 3TC | 0.84 | 77.78 | 255 | 2706 |
| EFV | 0.79 | 76.39 | 212 | 2567 |
| AZT | 0.74 | 76.87 | 207 | 2383 |
| DDI | 0.58 | 72.57 | 209 | 2380 |
| TDF | 0.70 | 79.46 | 180 | 2014 |
| ETR | 0.69 | 70.23 | 94 | 1195 |
| FTC | 0.68 | 73.41 | 48 | 556 |
| EVG | 0.74 | 77.29 | 89 | 1624 |
| RAL | 0.72 | 71.66 | 93 | 1690 |
| DTG | 0.78 | 77.20 | 74 | 962 |
| BIC | 0.65 | 69.74 | 46 | 609 |
| NFV | 0.58 | 76.68 | 197 | 2418 |
| SQV | 0.68 | 71.84 | 195 | 2368 |
| FPV | 0.81 | 74.96 | 195 | 2321 |
| IDV | 0.72 | 77.74 | 191 | 2361 |
| RTV | 0.81 | 83.66 | 187 | 2331 |
| LPV | 0.79 | 81.45 | 176 | 2048 |
| TPV | 0.91 | 73.18 | 122 | 1327 |
| ATV | 0.55 | 74.62 | 154 | 1661 |

**Supplementary Table-4:** Determination of cutoff values for PGX

| **Drug** | **N** | **Susceptible (S)** | **Low-Level Res (LLR)** | **Intermediate Res (IR)** | **High-Level Res (HLR)** | **Clinical Note** |
| --- | --- | --- | --- | --- | --- | --- |
| 3TC | 655 | FC ≤ 5 | 5 < FC ≤ 15 | 15 < FC ≤ 50 | FC > 50 | High cutoff reflects M184V mutation |
| ABC | 462 | FC ≤ 3.6 | 3.6 < FC ≤ 5.5 | 5.5 < FC ≤ 7.2 | FC > 7.2 | Standard susceptibility range |
| ATV | 290 | FC ≤ 5.4 | 5.4 < FC ≤ 22.5 | 22.5 < FC ≤ 60.7 | FC > 60.7 | Elevated but clinically acceptable |
| AZT | 607 | FC ≤ 4.6 | 4.6 < FC ≤ 30.1 | 30.1 < FC ≤ 135.3 | FC > 135.3 | Standard susceptibility range |
| BIC | 540 | FC ≤ 1.1 | 1.1 < FC ≤ 2.2 | 2.2 < FC ≤ 3.5 | FC > 3.5 | INSTI - high genetic barrier |
| D4T | 611 | FC ≤ 1.8 | 1.8 < FC ≤ 2.5 | 2.5 < FC ≤ 3.8 | FC > 3.8 | Highly susceptible |
| DDI | 609 | FC ≤ 1.7 | 1.7 < FC ≤ 2.0 | 2.0 < FC ≤ 2.6 | FC > 2.6 | Highly susceptible |
| DTG | 889 | FC ≤ 1.4 | 1.4 < FC ≤ 1.9 | 1.9 < FC ≤ 4.5 | FC > 4.5 | INSTI - high genetic barrier |
| EFV | 691 | FC ≤ 2.9 | 2.9 < FC ≤ 9.6 | 9.6 < FC ≤ 81.7 | FC > 81.7 | Standard susceptibility range |
| EVG | 1532 | FC ≤ 3.3 | 3.3 < FC ≤ 18.0 | 18.0 < FC ≤ 69.4 | FC > 69.4 | INSTI - good susceptibility prediction |
| FPV | 797 | FC ≤ 1.6 | 1.6 < FC ≤ 4.5 | 4.5 < FC ≤ 13.9 | FC > 13.9 | Highly susceptible |
| IDV | 801 | FC ≤ 3.3 | 3.3 < FC ≤ 10.0 | 10.0 < FC ≤ 22.6 | FC > 22.6 | Standard susceptibility range |
| LPV | 501 | FC ≤ 12.1 | 12.1 < FC ≤ 35.1 | 35.1 < FC ≤ 69.3 | FC > 69.3 | Elevated but acceptable for PIs |
| NFV | 836 | FC ≤ 10.0 | 10.0 < FC ≤ 23.8 | 23.8 < FC ≤ 52.2 | FC > 52.2 | Elevated but acceptable for PIs |
| NVP | 706 | FC ≤ 11.4 | 11.4 < FC ≤ 72.3 | 72.3 < FC ≤ 97.3 | FC > 97.3 | Use with caution - higher resistance potential |
| RAL | 1636 | FC ≤ 2.9 | 2.9 < FC ≤ 10.2 | 10.2 < FC ≤ 60.4 | FC > 60.4 | INSTI - good susceptibility prediction |
| RTV | 802 | FC ≤ 7.4 | 7.4 < FC ≤ 30.6 | 30.6 < FC ≤ 82.8 | FC > 82.8 | Elevated but acceptable for PIs |
| SQV | 824 | FC ≤ 1.9 | 1.9 < FC ≤ 7.8 | 7.8 < FC ≤ 40.0 | FC > 40.0 | Highly susceptible |
| TDF | 296 | FC ≤ 1.4 | 1.4 < FC ≤ 2.1 | 2.1 < FC ≤ 3.4 | FC > 3.4 | Highly susceptible |
| TPV | 148 | FC ≤ 1.2 | 1.2 < FC ≤ 3.4 | 3.4 < FC ≤ 8.9 | FC > 8.9 | Highly susceptible |

**Supplementary Table 5:** *X*2 values and observed agreements for PGX rule-based engine

|  | | | |
| --- | --- | --- | --- |
|  | *X*2 | **p_value** | **Observed_Agreement** |
| **3TC** | 2094.46 | 0.00 | 0.85 |
| **FTC** | 2094.46 | 0.00 | 0.85 |
| **ABC** | 1993.27 | 0.00 | 0.78 |
| **AZT** | 732.67 | 0.00 | 0.66 |
| **TDF** | 611.76 | 0.00 | 0.71 |
| **DOR** | 1700.51 | 0.00 | 0.77 |
| **EFV** | 2022.52 | 0.00 | 0.79 |
| **ETR** | 2002.50 | 0.00 | 0.77 |
| **NVP** | 1729.45 | 0.00 | 0.83 |
| **RPV** | 2110.84 | 0.00 | 0.81 |
| **ATV** | 289.27 | 0.00 | 0.89 |
| **DRV** | 413.68 | 0.00 | 0.93 |
| **LPV** | 206.78 | 0.00 | 0.88 |

**Supplementary Table 6:** INSTI performance for the PGX-Rule based engine (Total number of sequences analyzed N=2,539)

| **Drug** | **HIVDB resistant n (%)** | **Exact agreement (%)** | **±1 agreement (%)** | **Major discrepancy (%)** | **PGX higher (%)** | **PGX lower (%)** | **MAE (0–3)** | **PABAK** | **MCC** |
| --- | --- | --- | --- | --- | --- | --- | --- | --- | --- |
| **BIC** | 65 (2.6%) | 97.5 | 99.1 | 0.9 | 0.5 | 2 | 0.038 | 0.95 | 0.355 |
| **CAB** | 200 (7.9%) | 92.1 | 98.7 | 1.3 | 0.8 | 7.1 | 0.103 | 0.842 | 0.22 |
| **DTG** | 65 (2.6%) | 97.5 | 99 | 1 | 0.5 | 2 | 0.041 | 0.95 | 0.355 |
| **EVG** | 198 (7.8%) | 93.3 | 97.8 | 2.2 | 0.7 | 6 | 0.107 | 0.865 | 0.394 |
| **RAL** | 198 (7.8%) | 93.3 | 97.6 | 2.4 | 0.7 | 6 | 0.112 | 0.866 | 0.394 |





**Supplementary Figure 1:** PGX ML Data set characteristics for the training and validation data


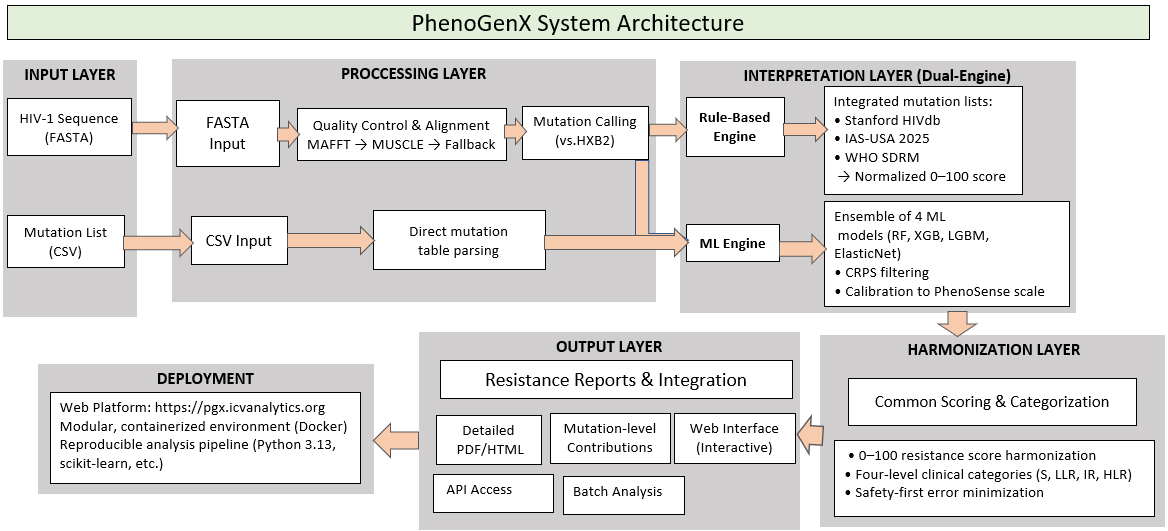


**Supplementary Figure 2:** PGX architecture from input to deployment


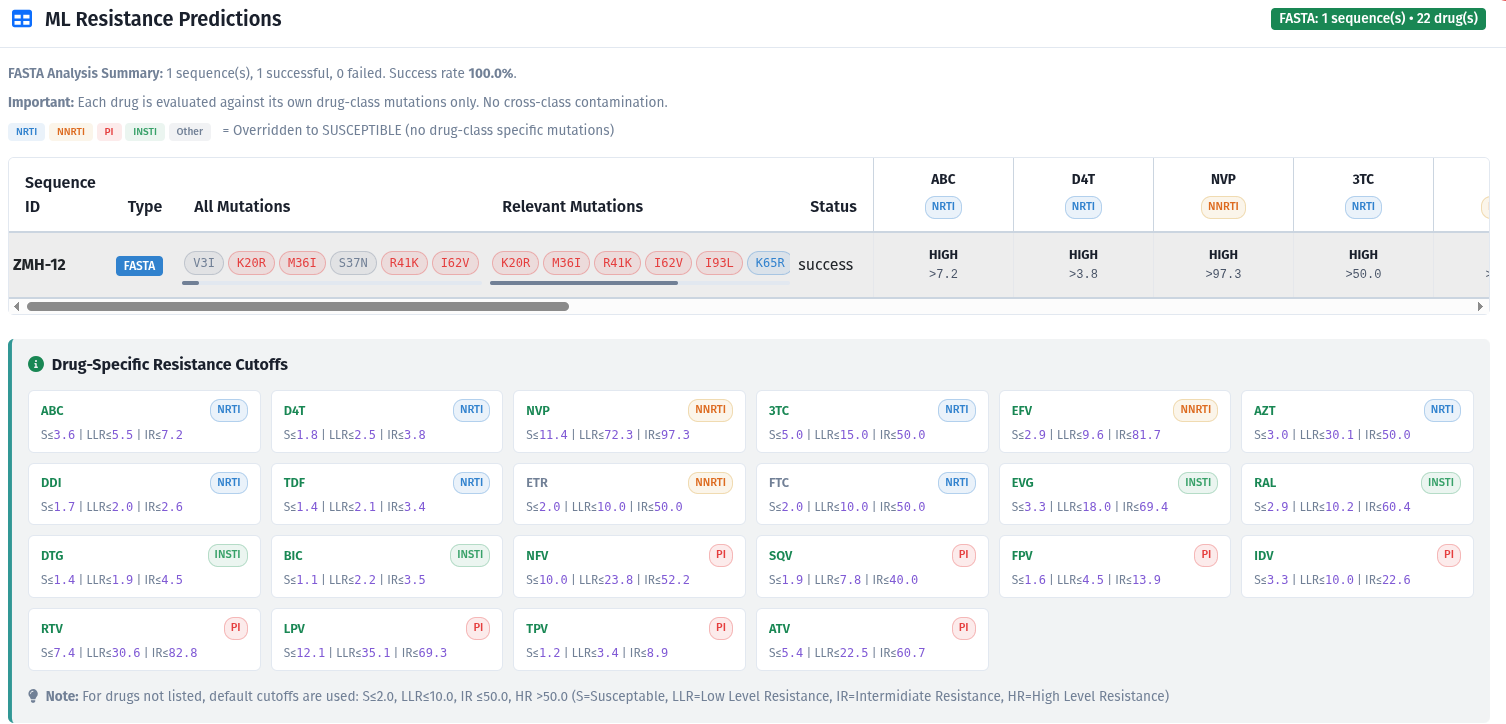

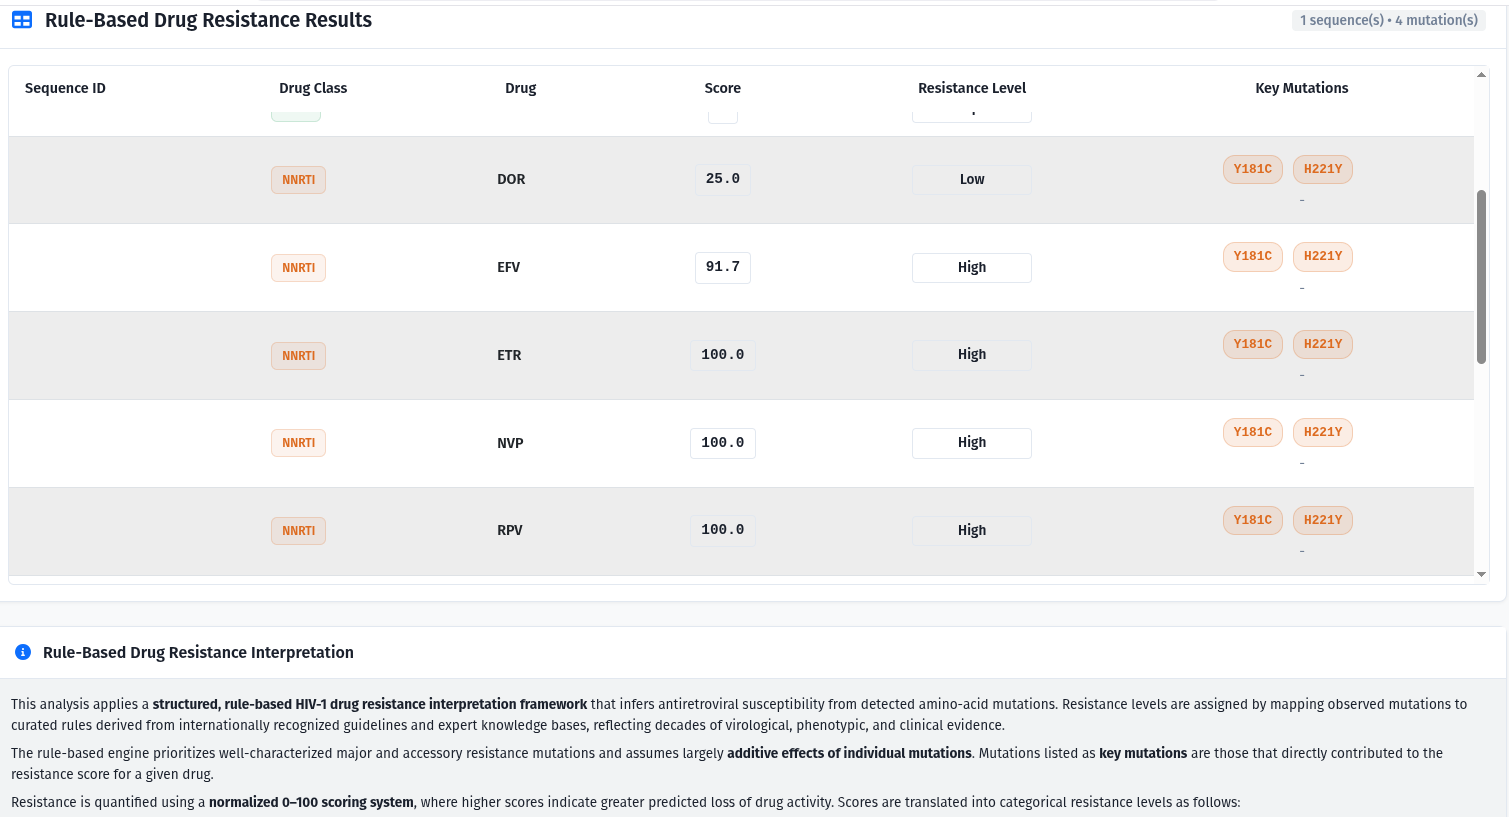


**Supplementary Figure 3:** PGX result output for the ML and rule based analysis (A and B)


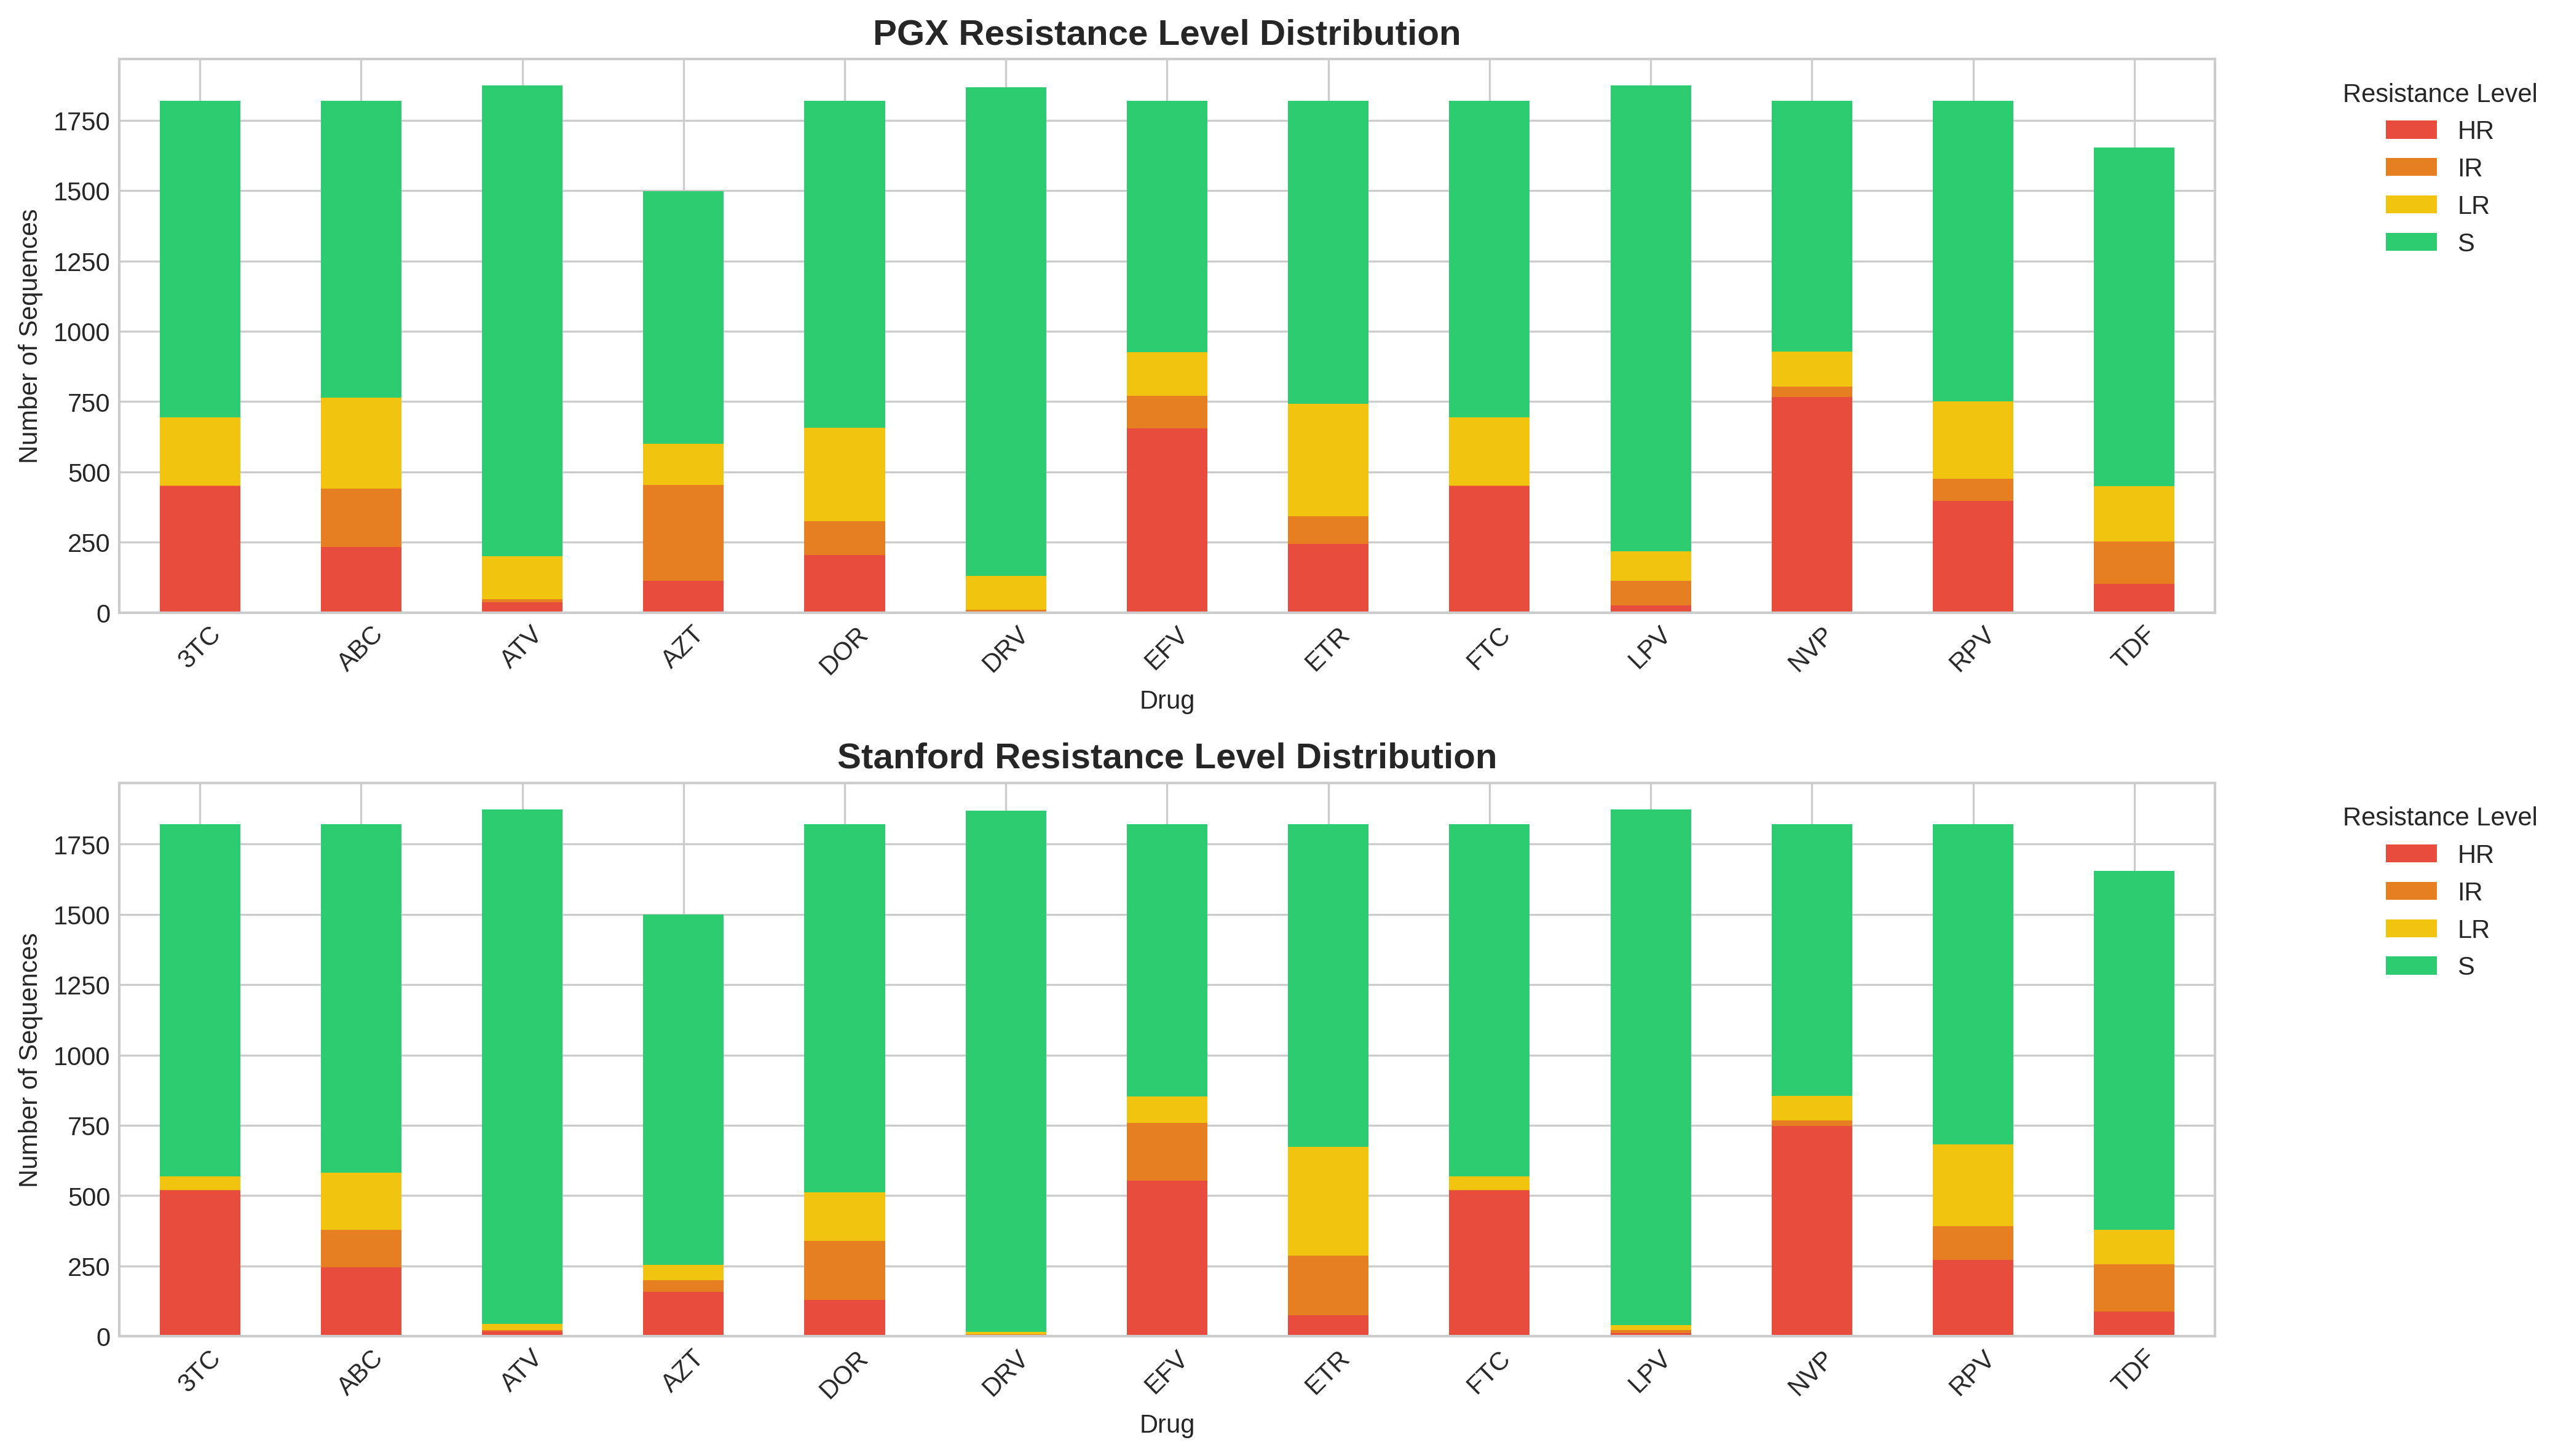


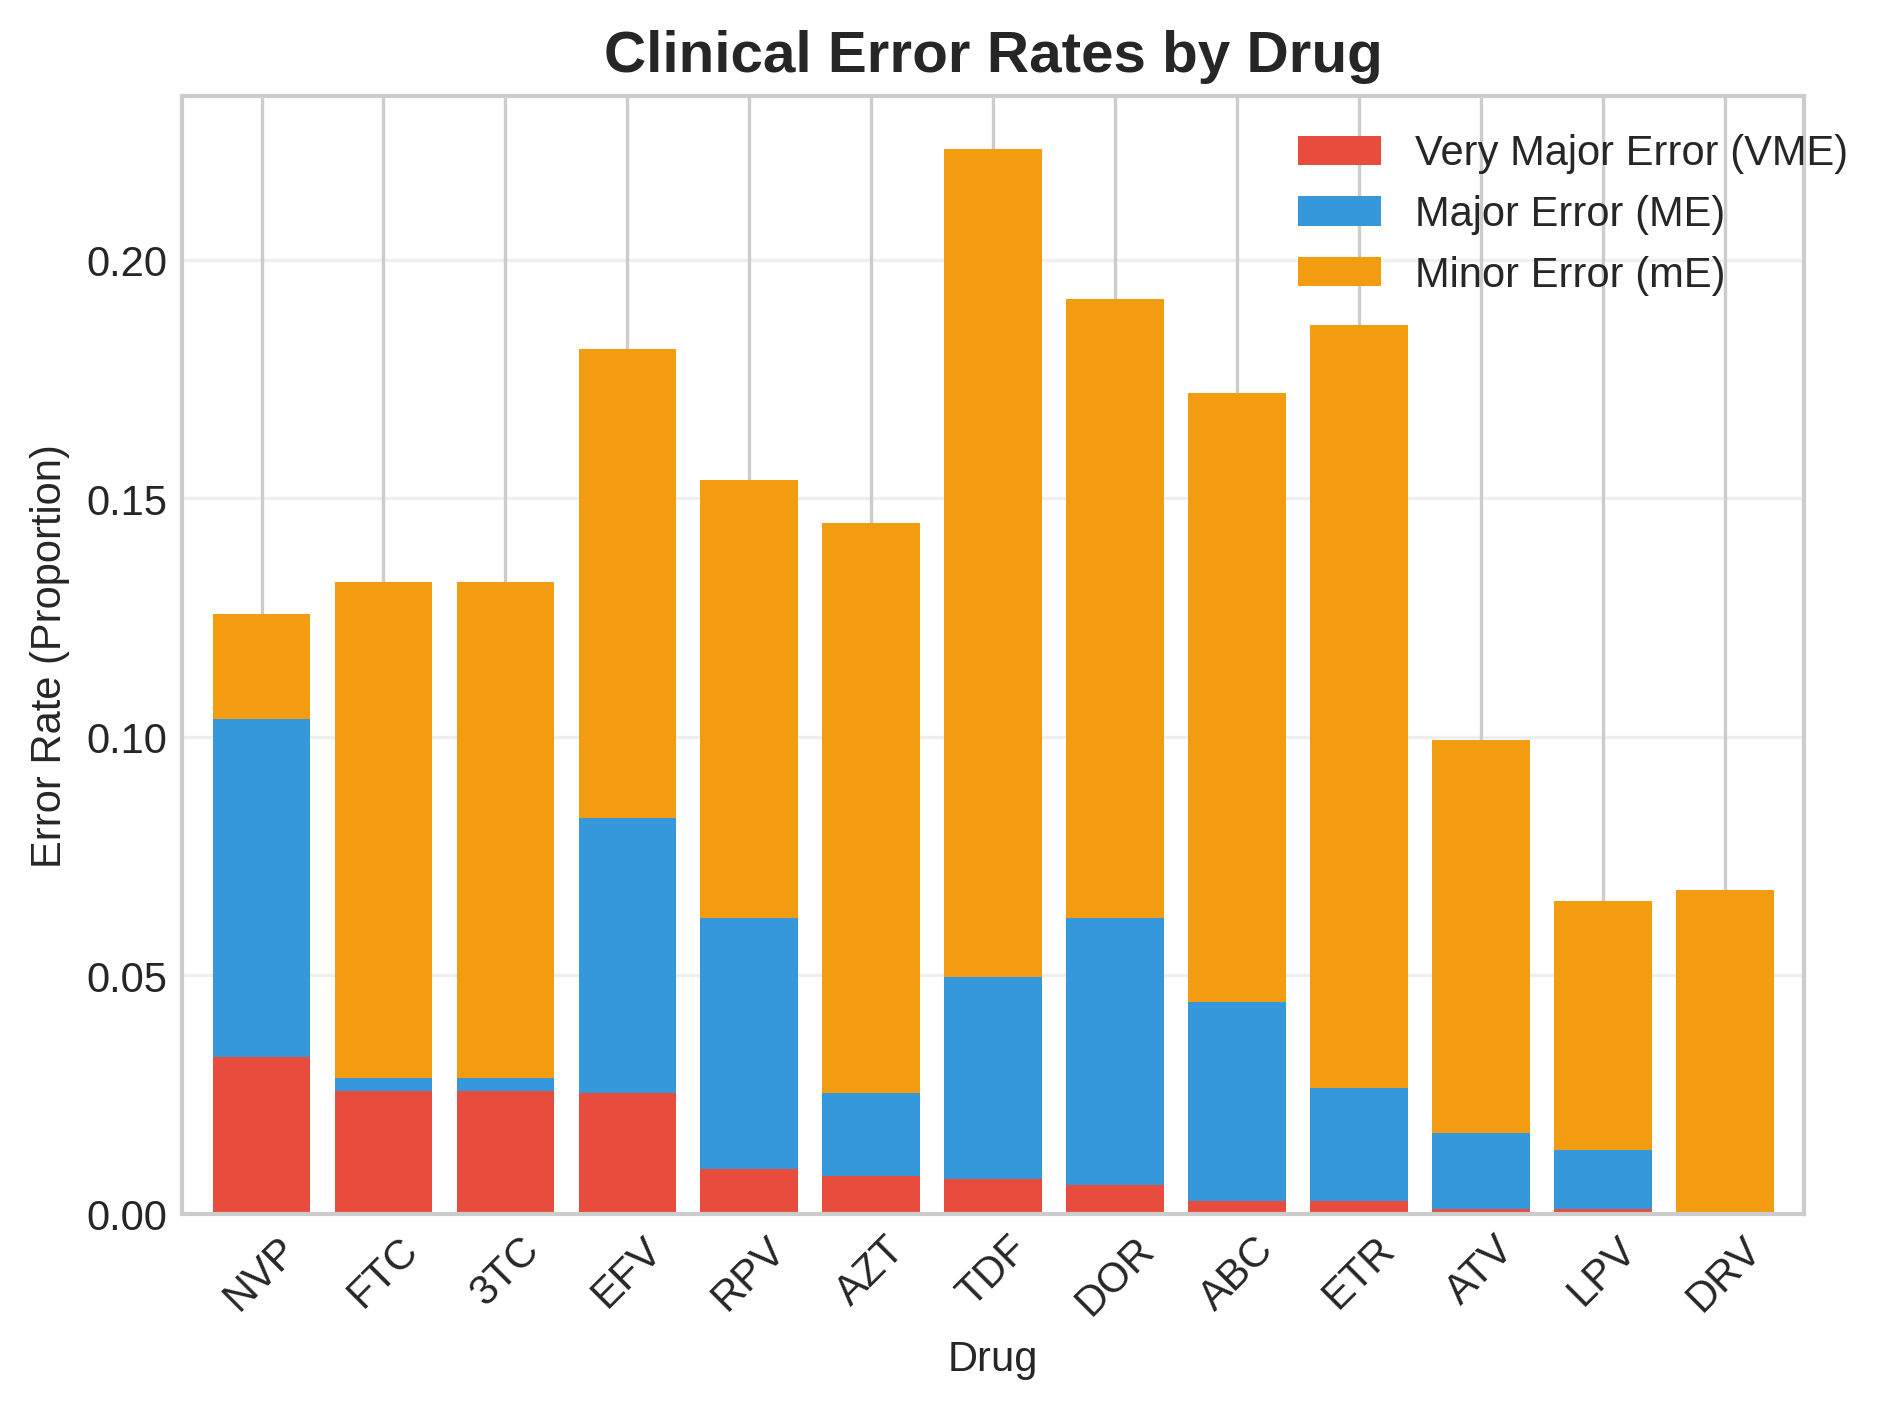


**Supplementary Figure 4:** Clinical Error Rates Across Antiretroviral Drugs

Stacked bars show the distribution of Very Major Errors (VME: false susceptibility), Major Errors (ME: false resistance), and Minor Errors (mE: categorical disagreements within adjacent levels) for each antiretroviral drug when comparing PGX predictions with Stanford HIVdb classifications. Minor errors were the most frequent across drugs, while VMEs-clinically the most critical-remained low for all drugs, indicating that PGX rarely misclassifies resistant sequences as susceptible.


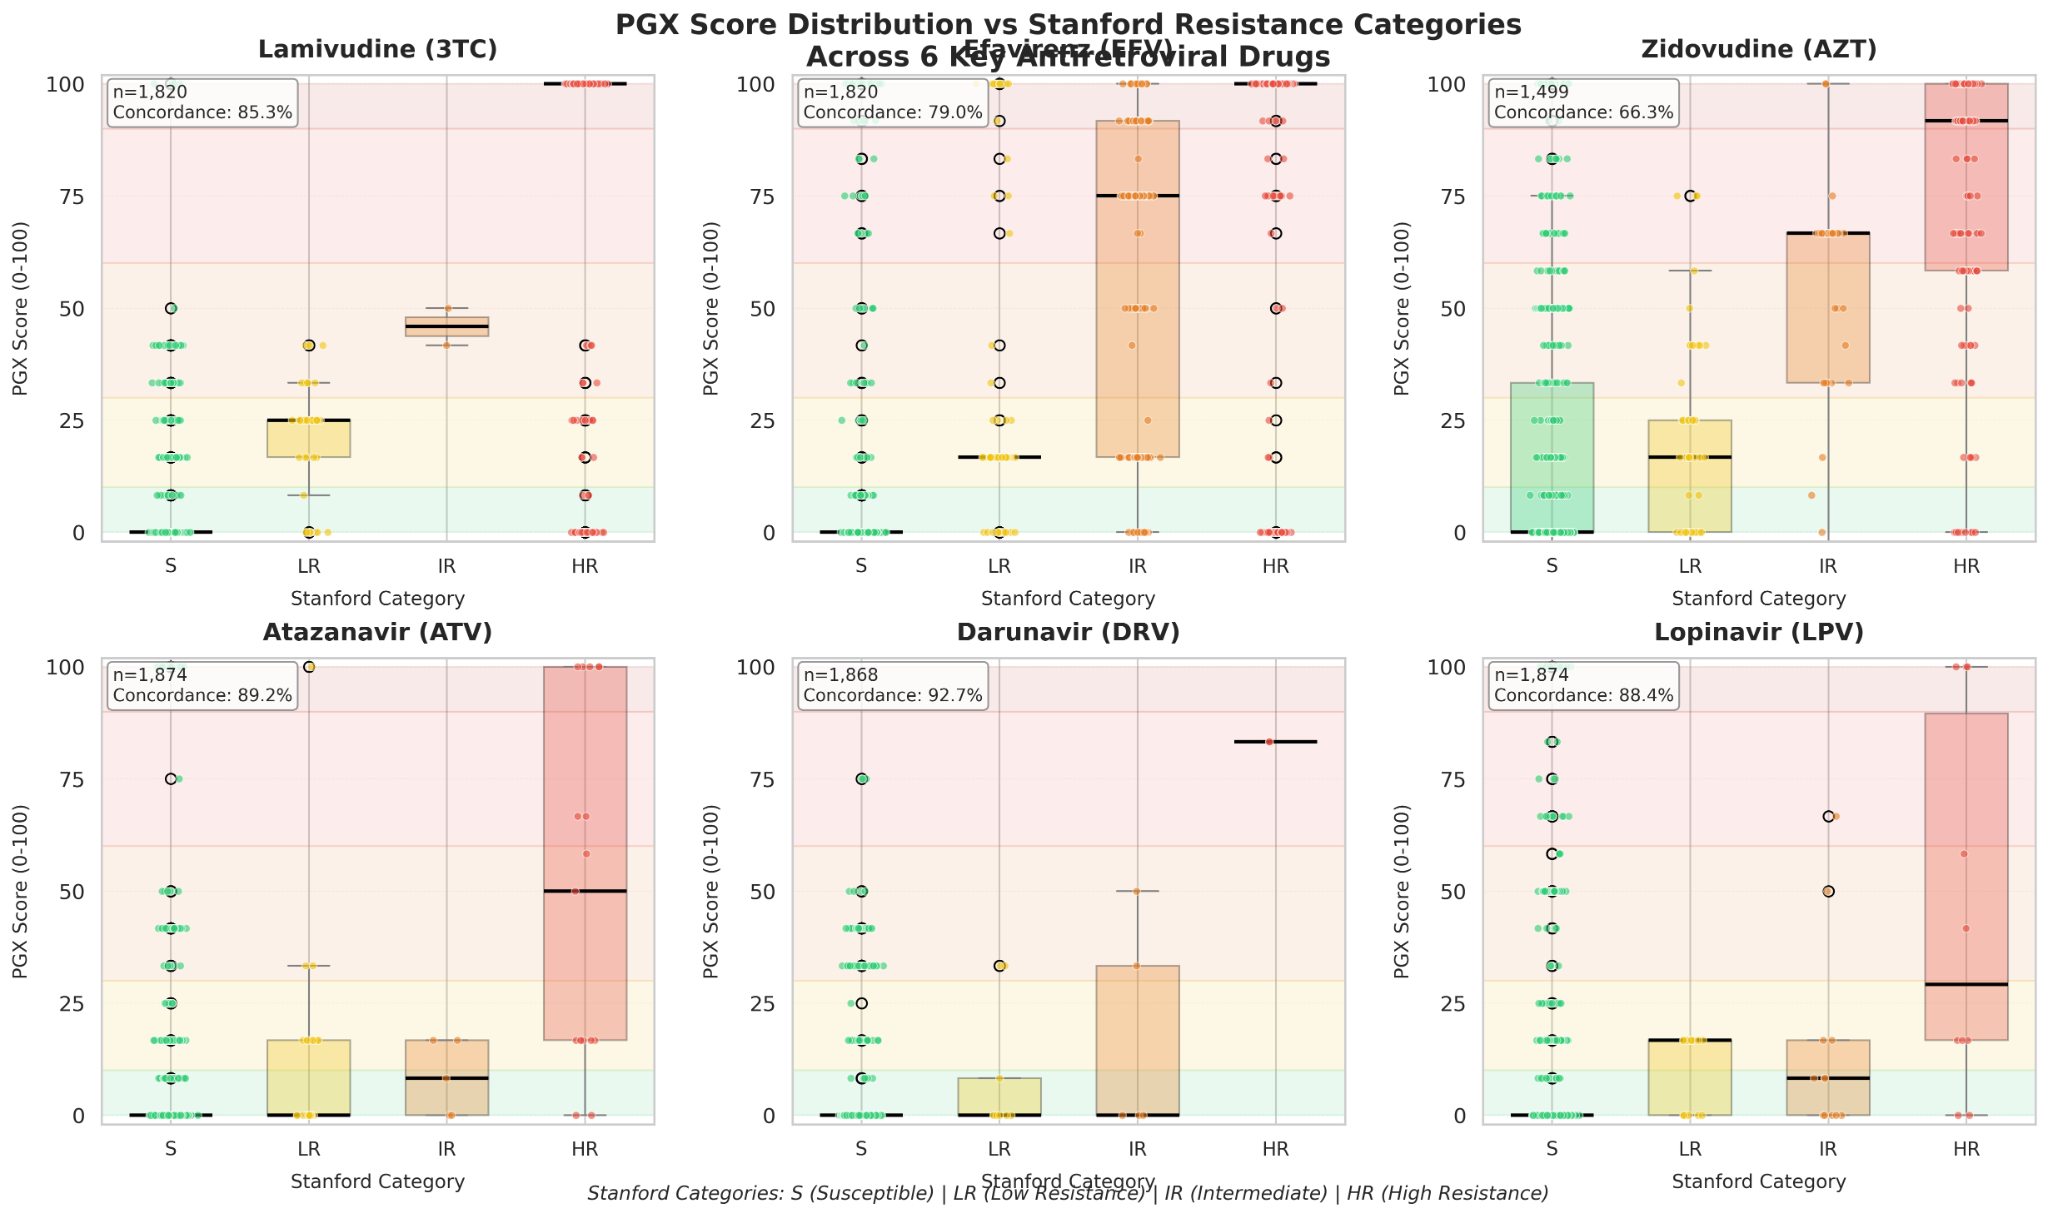


**Supplementary Figure 5:** Association Between PGX Susceptibility Scores (0-100) and Stanford HIVdb Resistance Categories Across Six Protease Inhibitors

*LR=Low-level Resistance, IR=Intermediate Resistance, HR=High-level Resistance. Concordance values indicate the agreement between PGX score-based predictions and Stanford HIVdb genotypic resistance interpretations. Data represent results from clinical isolates tested against Atazanavir (ATV), Darunavir (DRV), and Amprenavir (APV). PGX=Pharmacogenetic; Stanford categories refer to the Stanford HIV Drug Resistance Database classification.*
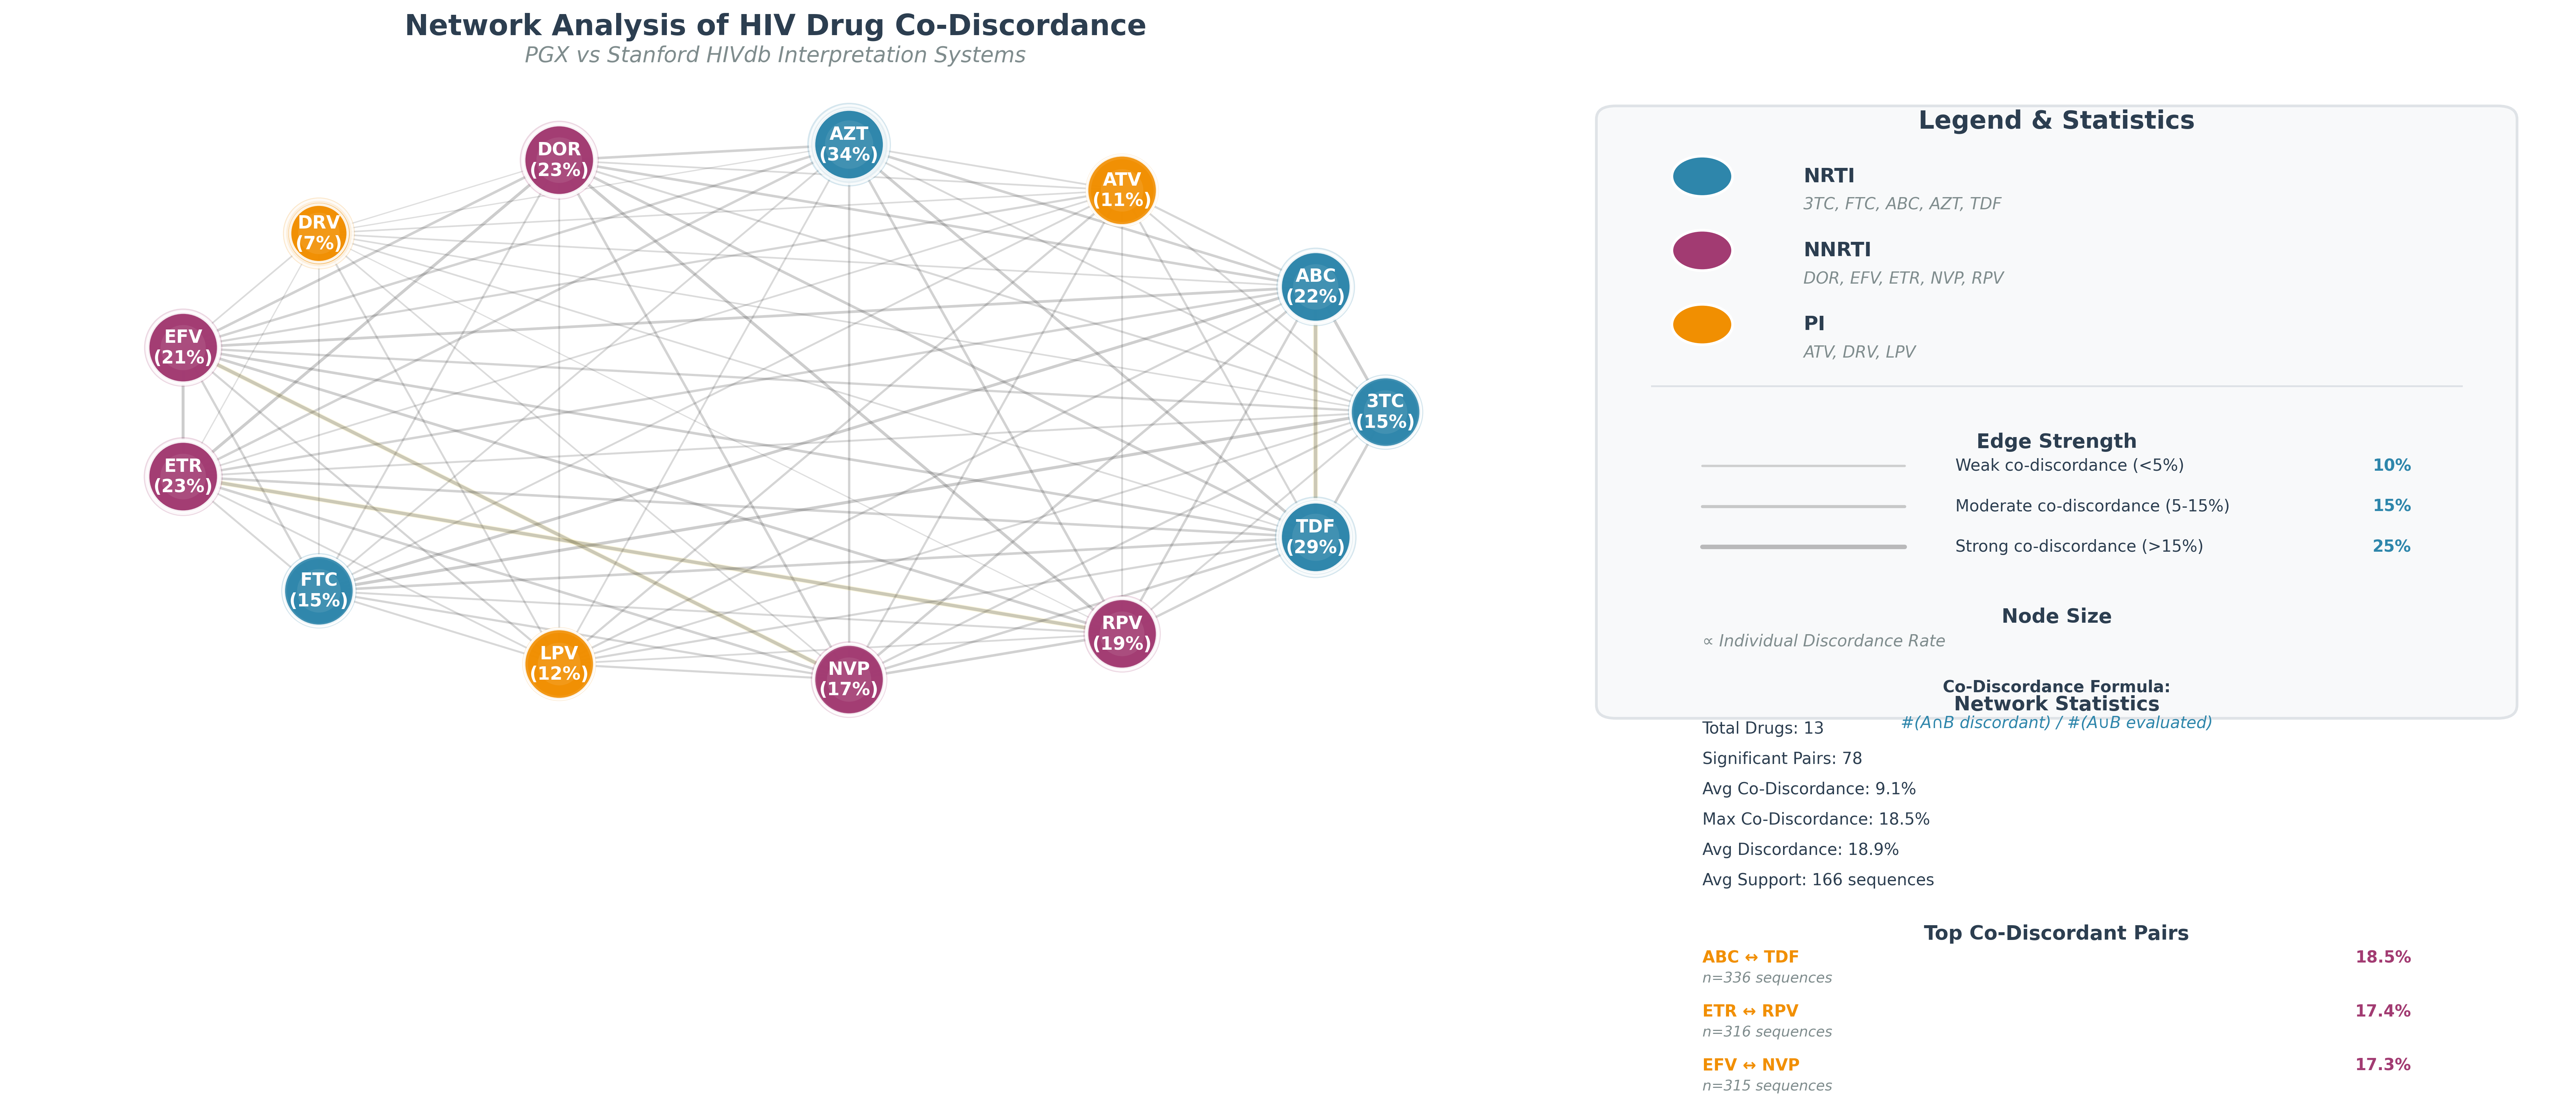


**Figure 6:** Network Analysis of Drug Co-Discordance Between PGx and Stanford HIVdb Genotypic Resistance Interpretation Systems

*NRTI=Nucleoside Reverse Transcriptase Inhibitor; NNRTI=Non-Nucleoside Reverse Transcriptase Inhibitor; Protease Inhibitor. Node size is proportional to the rate of discordance for individual drugs. Edge strength and color indicate the frequency of co-discordance between drug pairs (weak: <5%, moderate: 5-15%, strong: >15%). Co‑discordance is defined as the proportion of sequences where both drugs in a pair were discordant between the two interpretation systems. Network statistics are based on 1,068 clinical HIV sequences. PGx+Pharmacogenetic interpretation system; Stanford HIVdb = Stanford University HIV Drug Resistance Database.*
